# Supplementary material for: Development of a Honey Bee RNA Virus Vector Based on the Genome of Deformed Wing Virus
Source: Preprints.org preprint supplement (doi:10.20944/preprints202002.0321.v1), 2020-02-23
Supplement: Supplementary file 1 [file supplementary]

**Text S2. Nucleotide sequences of the Deformed wing virus vector cDNA clones pDWV-L-GFP and pDWV-S-GFP.** The clones are based on the clone DWV-304 (GenBank Accession number MG831200). GFP RNA inserts are shown in green, yellow highlight – duplicated flanking sequences derived from the DWV LP-VP2 border, blue highlight – sequences of *Ascl* and *Bam*HI restriction sites.

**>DWV-L-GFP**

TTTAAAATTCGCTATGGGAGGCGATTTATGCCTTCCATAGCGAATTACGGTGCAACTAACAATTTTAGATA  
GTAGCCATGAACAAACATTATAGTGGCTCACTACGTATTGATCATTTTTATAATGACTTGCCTAGCATGAA  
GCGCATGCTTGTAGTTGTAACATATGTTACTTTGCAAGTTGGAGTTTACTATTTTGGATTATGAATATGTGC  
ACTTAGTGTCTGTATTTATAGTCGTTTGTGGTTCAAGGTTTGTGTTAGTAGTACACTTATGTATGAATGT  
ACCTTTAGTATGAATGTTATAGAATGACAATATCGAAAGAAAAATCTTTATAAAATACAAAATATTGTTT  
TTATTATTTTCGATATGGTGTTTTATAGAGTAGATTGCCATGTGACCGCTCGTAGAAGTCCATTATGGTTTA  
TCAATCGAAGTTGAATGTATTTATAAGAATATTATACTTAATTAATAATATTAGTAGTCCGTAACATTAT  
CATCCTTTTTTCAGTTTGATGTGATAATAGACCACTGCAGTATCGAGTAGAGTTTCAATGCGTAGTGCAAT  
AGTACAATCACTGTCACCGACCATCTATTGTAATGATAGATTTGTGCGAAACCATTATTTATGAAGTGACT  
AGCAATCATGGATTAAATTAGATGGTATTCTAGTTTAGAGGTGATTTCGGCGCTGCGGTGCGACTGAAACTT  
CTAAATTAGCATGTCAGATTGTATTATGAATGCGTTAGTAGTAATTTCTGCGATAGAGCTGGGACCCCTCA  
GTCTCTCAGGTATTGTACGAGGCGAAAGTGTGAAAGTTTGTATGTGTTTTTATATGTACGACTGTATCGG  
GAATTCCTTTAGCAAGAATCCTTTTAATACAGTATAATCTGTGCTACGGTACGTTACGTTTCGACGGGCACC  
CGTTAATGTCTCATAGCCAGACGATGGCGGATGGAAAGACATCATATTTTATTTTAATGCTGTCTTTATT  
GCTGATTTATTTTGTCTGTTTTTATTTGCTATTTTATATTTGCTAATTTTCATTATTGCGAAATATATTACA  
TTGCTATTTTATTTATATACGCTAGATTCAATTTTATTTTTCCTATATTTTCAATTTAATTTTGATTTTGA  
AGGTAAATATATATAATTAATTATTAATAATGGCCTTCAGTTGTGGAACCTCTCCTACTCTGCTGTGCGCC  
CAAGCTCCGTCCGTTGCCCATGCACCTCGTACATGGGAAGTTGATGAAGCCAGGCGGCGCCGAGTCATCAA  
ACGTTTGGCGCTGGAGCAAGAACGTATTTCGCAACGTTCTTGACGCCGGCGTCTATGACCAGGCGACATGGG  
AACAGGAGGACGCGCGCGATAATGAGTTTCTAACGGAACAATTAACAATTTATATACTATTTATTTCGATC  
GCCGAACGTTGCACGCGTCGACCTATTAAAGAGCACTCTCCTATATCAGTTTCAATAGGTTTGTCTCCATT  
GGAATCCCTCAAAGTCGAGGTGCGTCAAGAAGCAGGCGAATGTATATTTAAGAAACCTAAATACACGCGCG  
TTTGCAAGAAAGTGAAGCGTGTGCAACCCGCTTCGTTTCGTGAAAAAGTTGTTTCGTCTATGTGTTCTAGA  
TCTCCTATGCTATTATTTAAGCTTAAGAAAAATTATTTATGATTTGCACTTATATAGATTAAGAAAACAGAT  
TAGGATTTTTGAGACGTCAAAAACAGCGGAGTATGAGTTAGAGTGTGTCACTAATCTGTTACAATTATCGA  
ATCCG**GTGCAGGC**AAAACCAGAGATGGATA**AACCTAATCCAGGA****GGCGCGCA**ATGGTGAGCAAGGGCGAG  
**GAGCTGTTACCGGGGTGGTGCCCATCCTGGTCGAGCTGGACGGCGACGTAAACGGCCACAAGTTCAGCGT**  
**GTCCGGCGAGGGCGAGGGCGATGCCACCTACGGCAAGCTGACCCTGAAGTTCATCTGCACCACCGGCAAGC**  
**TGCCCGTGCCCTGGCCACCCCTCGTGACCACCCCTGACCTACGGCGTGCAAGTTCAGCCGCTACCCCGAC**  
**CACATGAAGCAGCAGCACTTCTTCAAGTCCGCCATGCCCGAAGGCTACGTCCAGGAGCGCACCATCTTCTT**  
**CAAGGACGACGGCAACTACAAGACCCGCGCCGAGGTGAAGTTCGAGGGCGACACCCTGGTGAACCGCATCG**  
**AGCTGAAGGGCATCGACTTCAAGGAGGACGGCAACATCCTGGGGCACAAGCTGGAGTACAACATAACAGC**  
**CACAACGTCTATATCATGGCCGACAAGCAGAAGAACGGCATCAAGGTGAACCTCAAGATCCGCCACAACAT**  
**CGAGGACGGCAGCGTGCACTCGCCGACCACTACCAGCAGAACAACCCCATCGGCGACGGCCCCGTGCTGC**  
**TGCCCGACAACCACTACCTGAGCACCCAGTCCGCCCTGAGCAAAGACCCCAACGAGAAGCGCGATCACATG**  
**GTCTTGCTGGAGTTCGTGACCGCCGCGGGGATCACTCTCGGCATGGACGAGCTGTACAAGGGATCCGTGCA**  
**GGCAAAACCAGAGATGGATAAACCTAATCCAGGA**CCTGATGGCGAGGGTGAAGTTGAATTAGAAAAGGATA  
GTAATGTTGTTTTAACAACCTCAGCGAGATCCTAGTACATCTATTCCAGCGCCGGTGAGCGTAAATGGAGT  
AGATGGACTAGTAATGATGTAGTAGATGATTACGCCACAATCACATCTCGATGGTATCAGATTGCTGAATT  
TGTTTGGTTCGAAGGATGATCCATTTGATAAGGAGTTAGCACGTTTAATTTTGCCTCGAGCTTTGTTATCTA  
GTATAGAGGCTAATCTGATGCTATATGTGATGTGCCTAATACTATTCCATTTAAGGTACACGCATATTGG  
CGAGGCGATATGGAAGTTAGAGTTCAAATTAATTCAAATAAATTCCAAGTTGGTCAATTACAAGCTACTTG  
GTATTATTTCGATCATGAGAAATTTGAATATATCGTCTAAGAGAAGCGTTTATGGATTTTACAAATGGATC  
ATGCTTTGATTAGTGCGTCAGCAAGTAATGAAGCAAAATTAGTTATTCCATATAAGCATGTTTATCCATTT  
TTACCAACAAGAATTGTGCCAGATTGGACTACTGGCATTTTAGATATGGGTGCTTTGAACATTTCGTGTAAT  
TGCTCCCTTACGGATGAGTGCTACTGGTCCAACCTGTAATGTCGTGCTGTTTATTAAATTAATAACA  
GCGAGTTTACAGGGACTTCCTCTGGTAAGTTTATGCGAGCCAAATCAGGGCAAAACCTGAGATGGATCGT  
ATATTAAATTTAGCAGAAGGATTGTTGAATAACACGATTGGTGGTAATAATATGGATAATCCTTCTTATCA  
ACAATCTCCTCGTCATTTTGTCCCGACTGGTATGCACAGCTTAGCTTTAGGTACTAATTTAGTTGAACCAT  
TACATGCATTACGTTTGGATGCAGCCGGTACGACACAACATCCTGTAGGTTGTGCTCCTGATGAAGATATG

ACTGTGTCTTCCATTGCATCTCGATATGGACTAATTAGACGGGTACAATGGAAGAAAGATCATGCTAAAGG  
ATCGCTTTTGTACAAATTAGATGCTGATCCATTTGTGGAGCAAAGAATTGAAGGTACGAATCCAATATCTT  
TGTATTGGTTTCGCACCCGTGGGTGTAGTATCTAGTATGTTTATGCAATGGCGTGGTTCATTAGAATATAGG  
TTTGATATTATAGCATCCCAATTTCACTAGGTAGTTAATTGTAGGTTATGTGCCCGGTTTGACAGCATC  
TTTGCAACTTCAAATGGACTATATGAAATTGAAGTCATCGAGTTATGTAGTATTTGATTTACAGGAAAGTA  
ATAGCTTCACTTTTGAGGTGCCATATGTTTCATATAGACCATGGTGGGTGCGTAAATATGGTGGCAATTAT  
TTGCCCTCGTCAACTGATGCTCCTAGTACATTATTCATGTATGTGCAGGTTCCGTTGATACCTATGGAAGC  
TGTTTCAGATACTATTGATATCAATGTGTACGTACGGGGCGGTAGTTCATTTGAAGTTTGTGTTCCAGTCC  
AACCTAGTTTAGGTTTGAATTGGAACACAGACTTTATTTTACGTAATGACGAAGAATACAGGGCTAAGACA  
GGTTATGCACCATATTATGCTGGAGTGTGGCATAGCTTTAATAATAGTAATTCTCTTGTTTTTAGGTGGGG  
ATCTGCTTCTGACCAAATTGCTCAGTGGCCGACAATTTCAGTACCAAGAGGTGAGTTAGCTTTCTTACGAA  
TTAAGGATGGAAGCAAGCTGCTGTAGGAACCAACCTTGGCGTACGATGGTTGTTTGGCCTTCTGGTCAC  
GGCTATAATATTGGTATACCCACGTATAATGCTGAACGAGCTCGCCAGCTTGCACAACACTTATATGGTGG  
TGGATCATTAACCTGATGAGAAGGCCAAACAATTATTTGTTCTGCTAATCAACAAGGACCTGGTAAGGTAA  
GTAATGGAATCCGGTATGGGAAGTCATGCGTGCACCATTTGTCAACACAGCGTGCGCATATGCAAGATTTT  
GAATTTATTGAGGCTATTCCAGAAGGAGAGGAGTCTCGTAATACTACAGTCTTGGATACGACCACTACTTT  
ACAGTCGAGTGGGTTTGGTCGCGCCTTCTTTGGAGAAGCTTTAATGATCTTAAACGTTAATGCGGCGAT  
ATCAATTATATGGTCAATTATTATTGTCCGTTACTACGGATAAGGATATTGATCATTGTATGTTTACCTTC  
CCTTGTTTACCACAAGGGTTAGCGTTAGACATTGGTTCTGCTGGCTCTCCACATGAAATCTTTAATAGATG  
TCGTGATGGTATTATACCATTAAATTGCATCTGGATATAGATTTTATAGAGGAGATTTGCGTTATAAGATTG  
TTTTTCCAAGTAATGTTAATAGCAACATTTGGGTACAACATCGACCGGATCGTAGACTGGAAGGATGGTCC  
GCGGCTAAGATTGTAAATTGTGATGCTGTGTCTACTGGTCAAGGAGTGTATAATCATGGTTATGCTAGTCA  
CATTCAAATCACGCGTGTAAATAATGTTATAGAATTGGAAGTTCCATTTTATAATGCTACTTGTATATAATT  
ATTTACAGGCGTTTAAATGCGTCTAGCGCTGCATCTAGTTATGCAGTATCTTTAGGAGAAATATCGGTTGGT  
TTTCAAGCCACAAGTGATGATATCGCATCTATCGTCAACAAACCTGTTACTATTTATTATAGTATTGGAGA  
TGGTATGCAGTTTTCTCAGTGGGTGGATATCAACCGATGATGATCCTAGATCAGCTTCCTGCACCAGTAG  
TAAGGGCCGTGCCTGAGGGCCCTATTGCGAAGATTAAAACTTCTTCCATCAAACAGCCGACGAAGTTAGA  
GAAGCTCAGGCAGCAAAGATGCGTGAAGATATGGGTATGGTTGTTCAAGATGTTATTGGAGAAGTTAGCCA  
GGCCATACCGGATCTTCAACAACCGGAGGTTCAAGCAAATGTCTTCTCACTGGTGTCTCAGTTAGTGCATG  
CTATTATAGGTACTAGTTTGAAGACAGTAGCTTGGGCGATTGTTTCGATTTTTGTGACTTTAGGATTAATT  
GGACGCGAAATGATGCATTCAAGTTATTACTGTAGTCAAGCGGTTACTTGAGAAATATCACTTGGCGACGCA  
ACCCAGGAATCCGCCAGTTCAAGTACTGTTATATCTGCCGTTCCAGAAGCTCCCAATGCTGAAGCGGAGG  
AGGCAAGTGCTTGGGTATCCATTATTTATAATGGTGTGTGTAATATGCTTAATGTGGCTGCTCAAAAACCG  
AAACAATTTAAAGATTGGGTAAAATTAGCTACTGTAGATTTTAGTAATAATTGTAGAGGTAGTAATCAGGT  
ATTTGTGTTTTTCAAGAACACATTTGAAGTGTTGAAGAAAATGTGGGGTTATGTATTTTGTGAGAGTAATC  
CTGCAGCGCGTTTTGTTGAAAGCTGTGAATGACGAGCCTGAGATTTTGAAGCATGGGTGAAGGAATGTCTG  
TATTTGGATGATCCCAAATTTAGAATGCGTCGAGCGCATGATCAAGAGTATATCGAGCGAGTGTTCGCGC  
ACATTCATATGGACAAATTTTGCTACATGATTTAACTGCTGAAATGAACCAATCACGAAATTTGAGTGTGT  
TTACACGTGTGTATGATCAAATTTCAAATTTGAAGACTGATCTTATGGAATGGGATCGAATCCATATATA  
AGGCGTGAATGTTTTACGATATGCATGTGTGGTGCATCTGGAATTGGAATCATATTTGACCGATTCTTT  
ATGCAGCGAGCTCTTACGTGCGAGTCGTACTCCTGTGACAACAGGCATAAAATGTGTTGTTAATCCATTAT  
CTGATTATTGGGATCAGTGTGATTTTCAGCCTGTTTTGTGCGTTGATGATATGTGGAGTGTGAAACATCT  
ACTACGCTCGATAAGCAGTTGAACATGCTTTTCCAGGTCCATTTCCCTATCGTGCTTTCTCCTCCTAAAGC  
TGATTTAGAAGGTAAGAAAATGCGATATAACCCGGAATATTTATATACAATACGAATAAGCCTTTCCCGA  
GGTTTGATCGTATTGCTATGGAAGCTATTTATCGGCGTAGAAATGTTTTGATTGAATGTAAAGCGAGTGAA  
GAGAAGAAGCGAGGATGCAAACATTGTGAGAACGATATTCCTATTGCTGAATGTAGTCCTAAGATGTTGAA  
AGATTTCCATCACATCATATTTAGGTATGCACATGATGTATGTAATTCTGAGACCACATGGTCTGAATGGA  
TGACGTATAATGAATTTCTTGAATGGATAACTCCTGTGTATATGGCTAACCGTCGTAAGGCGAATGAATCG  
TTTAAGATGCGTGTAGATGAAATGCAAATGTTACGTATGGATGAGCCATTGGAAGGTGATAATATCCTCAA  
TAAGTATGTTGAAGTTAATCAGCGCTTAGTGGAGGAAATGAAGGCATTTAAGGAGCGTACACTATGGTCAG  
ATTTACATCGTTTTAGGTGCGGAAGTTAGTGGTCAAGTAAAGAAAGCTTTACCAACTATTTCTATAACTGAA  
AACTACCACATTGGACTGTTCAATGTGGTATTGCTAAACCTGAGATGGATCATGCTTATGAGGTTATGAG  
TTCGTATGCAGCTGGAATGAATGCAGAGATCGAAGCGCATGAACAAGTTCGGCGTTCATCAGTGAATGTC  
AATATGCAGAGCCTCAAGCTCCAAGAAATCCTGATGATGAAGGACCAACCATAGATGAAGAAGTTATGGGC  
GACACTGAATTCACATCACAGGCTCTAGAAGCTTGTGGATGAAGGTTATATAACTGGAAAACAGAAGAA  
GTATATAGCTACGTGGTGTAGTAAGCGTCGTGAACATACTGCTGACTTTGATCTTGTGTGGACTGATAATT  
TGCGTGTGTTAAGCGCGTATGTGCATGAACGTTTCATCTTCAACTCGGCTTTCTACGGATGACGTCAAGTTA

TATAAAACGATTAGCATGTTACATCAAAAGTACGATACCACAGAGTGTGCTAAATGTCAACATTGGTATGC  
ACCGTTGACTGATATCTATGTTGATGACAAGAAATTGTTCTGGTGTGAGAAAGAGAAAAAGACACTTATTG  
ATGTCCGAAAATTGTGCAAGAAGATGTAACCTGTTCAATCGAAATTGATTAATTTATCTGTTCCCTTGTTGGT  
GAAGTATGTATGTTACATTCAAAATATTTTAATTATCTTTCCATAAAGCATGGTTGTTGCGAGAATCCAAC  
TTGGCGCCTAATATATAATGGTACCAAGAAGGGTATGCCTGAGTACTTTATGAATTGTGTGGATGAAATAT  
CGTTAGATTCCAAATTTGGTAAAGTGAAAGTATGGTTGCAAGCAATCATTGATAAGTATTTAACTCGTCCC  
GTGAAAATGATTTCGTGATTTTCTTTTCAAGTGGTGGCCGCAAGTTGCGTATGTGTTGAGCTTGCTAGGTAT  
AATTGGTATAACTGCGTATGAAATGAGAAATCCGAAACCAACTTCTGAGGAATTAGCTGATCATTATGTGA  
ATAGGCATTGTAGCTCTGATTTTGGTCCACCAGGACTGGCATCACCTCAAGGATTGAAATATAGTGAAAGCA  
GTAACAGTAAAGGCACCTAGAAATCCATAGATTGCCAGTTACTACTAAGCCTCAGGGATCAACACAACAAGT  
AGACGCCGCTGTGAATAAAATTTCTACAGAACATGGTTTATATTGGTGTGTTTTCCCAAAGTGCCTGGTA  
GTAAGTGGCGAGATATTAATTTTAGGTGTCTTATGCTTCATAATAGGCAATGTTTAATGTTGAGGCATTAT  
ATTGAGTCAACTGCCGCCCTTTCTGAGGGAACCAAGTACTATTTTAAGTACATTGATAATCAAGAGACTAG  
AATGTCTGGTGTATTTCTGGTATTGAAATTGATTGTTGAATTTACCTAGATTGTATTATGGTGGTCTCG  
CGGGAGAGGAGTCGTTTGATAGCAATATCGTGCTTGTGACTATGCCTAATCGTATTCTGAGTGTAAAGAGC  
ATTATTAATTTATAGCGTCACATAATGAGCATATACGTGCTCAGAATGATGGAGTGTAGTAACTGGCGA  
CCATACTCAGCTATTGGCTTTTCGAGAATAATAAAACTCCAATAAGTATTAACGCTGATGGTTTGTATG  
AGGTTATACTTCAAGGAGTATATACTTATCCATACCACGGCGATGGTGTGTTGTGGTTCGATATTGTTATCT  
CGGAATTTACAACGGCCAATTATAGGTATCCATGTTGCTGGTACTGAGGGATTGCATGGTTTTGGAGTCGC  
TGAACCACTTGTACATGAAATGTTACCCGGTAAAGCGATCGAGAGTAAAAGAGAGCCGTATGATCGTGTGT  
ATGAACTTCCGTTGCGTGAATTAGATGAATCTGATATTGGTTTAGATACCGATTTATATCCGATTGGTAGA  
GTGGATGCAAAGCTAGCTCATGCTCAAAGCCCTTCTACTGGGATTAAGGAGACGCTTATTCATGGAACATT  
TGATGTAAGGACTGAACCAAATCCGATGTGATCACGTGATCCAAGAATAGCGCCGCATGATCCTTTGAAGT  
TAGGGTGTGAAAAGCATGGCATGCCTTGTTTACCCTTTAATAGGAAACATCTGGAATTAGCGACAAATCAT  
TTGAAAGAAAAATTAGTTTCTGTAGTTAAACCAATAAATGGTTGCAAGATTAGAAGTTTGAAGATGCTGT  
ATGTGGTGTGCCTGGATTAGATGGGTTTGATTGATATCGTGGAATACTAGTGTGTTTTCTTTGTCTT  
CATTAAGCCACCTGGAACATCAGGTAAGCGATGGTTGTTGATATTGAGCTACAAGACTCGGGATGTTAT  
CTCCTGCGTGGAATGCGTCCCGAACTTGAGATTCAATTATCAACGACACAGTTAATGAGGAAAAAGGGAAT  
AAAACCTCACACTATATTCACGGATTGTTTGAAAGATACTTGTGCTGTTGAAAAATGTAGAATACCTG  
GTAAGACTAGAATATTTAGTATAAGTCCGGTACAGTTTACCATAACCGTTTCGACAGTATTACCTAGACTTT  
ATGGCATCCTATCGAGCTGCACGACTTAATGCTGAGCATGGTATTGGTATTGATGTTAACAGCTTAGAGTG  
GACAAATTTGGCAACAAGGTTGTCTAAGTATGGCACTCACATCGTGACAGGAGACTATAAGAATTTTGGTC  
CTGGGTTAGATTCCGATGTTGCAGCTTCAGCGTTTGAAATTATTATCGACTGGGTATTACATTACACCGAA  
GAAGATAATAAAGACGAAATGAAGCGAGTAATGTGGACCATGGCGCAAGAGATCTTAGCGCCTAGTCATCT  
ATATCGCGATTTAGTGTACCGAGTACCTTGCGGAATTCCATCAGGTTCTCCAATAACGGACATATTGAATA  
CAATTTCAAATTGTTTGTTAATTAGGTTAGCTTGGTTAGGTATTACTGATTTGCCTTTGTCCGAGTTCTCT  
CAAAATGTTGTTCTTGTCTGTTATGGCGACGATCTTATCATGAATGTTAGCGATAACATGATTGATAAGTT  
TAACGCCGTGACGATAGGAAAAATCTTTTTCACAATATAAGATGGAATTTACGGATCAGGATAAATCAGGAA  
ATACTGTAAAGTGGCGGACGTTACAGACTGCTACTTTCTTAAACATGGGTTTTTAAACATCCAACCTAGA  
CCTGTGTTTCTAGCTAACCTGGATAAGGTCTCGGTAGAAGGAACGACGAATTGGACTCATGCTCGAGGATT  
GGGTCGTCTGACGCAACCATAGAAAATGCTAAACAAGCGTTAGAGTTAGCATTGTTGGGTGGGGTCTGAAT  
ATTTTAATTACGTCAGAAATACCATTAATGAGGCTTTTGACAAGTTGGGTATTTATGAGGACCTTATCACA  
TGGGATGAAATGGATGTTAGATGTTACGCTAGTGCGTAATATTTAATTTTAAATACTTATTAATTTTAATT  
TTATTTTAGGTTATTGGAATTGAGGGAAGTACCACCCCCCAAGACCTTCGTTTTAAATCTACTAAGAGGAG  
TAAACCTATATATAAGAGTCTAAAGACAGAGTGGATTAGACCATCATCTTTAGCTTATATATGGGGAAGGT  
TGAGTTGCCTCTAAAGACTCAGCTCCGTAGTAGAGTAGTTTAAATTACGATTAAAGTGGTACTCTAGGTTA  
GGTGTTACTCGCGTATTATCAACTTGTGGTAATGCGTCCTAATTTTAGTATAGTTTTAACCATAATAGTAA  
AAAAAAAAAAAAAAAAAAAAAAAAAAAA

**>DWV-S-DWV**

TTTAAATTCGCTATGGGAGGCGATTTATGCCTTCCATAGCGAATTACGGTGCAACTAACAATTTTAGATA  
GTAGCCATGAACAAACATTATAGTGGCTCACTACGTATTGATCATTTTTATAATGACTTGCGTAGCATGAA  
GCGCATGCTTGAGTTGTAACCTATGTTACTTTGCAAGTTGGAGTTTACTATTTTGGATTATGAATATGTGC  
ACTTAGTGTCTGTATTTATAGTCGTTTGTGGTTCAAGGTTTGTGTTAGTAGTACACTTATGTATGAATGT  
ACCTTTAGTATGAATGTTATAGAATGACAATATCGAAAGAAAAATCTTTATAAAATACAAAATATTGTTT  
TTATTATTTTCGATATGGTGTGTTTATAGAGTAGATTGCCATGTGACCGCTCGTAGAAGTCCATTATGGTTA

TCAATCGAAGTTGAATGTATTTATAAGAATATTATACTTAATTAATAATATTAGTAGTCCGTAACCTATTAT  
CATCCTTTTTTTCAGTTTGTATGTGATAATAGACCACTGCAGTATCGAGTAGAGTTTCGAATGCGTAGTGCAAT  
AGTACAATCACTGTCACCGACCATCTATTGTAATGATAGATTTGTTCGGAACCATTTATTTATGAAGTGACT  
AGCAATCATGGATTAAATTAGATGGTATTCTAGTTTAGAGGTGATTTCGGCGCTGCGGTGCGACTGAAACTT  
CTAAATTAGCATGTCAGATTGTATTATGAATGCGTTAGTAGTAATTTCTGCGATAGAGCTGGGACCCCTCA  
GTCTCTCAGGTATTGTACGAGGCGAAAGTGTGAAAGTTTTGTATGTGTTTTTATATGTACGACTGTATCGG  
GAATTCCTTTAGCAAGAATCCTTTTAATACAGTATAATCTGTGCTACGGTACGTTACGTTTCGACGGGCACC  
CGTTAATGTCTCATAGCCAGACGATGGCGGATGGAAAGACATCATATTTTTATTTTAATGCTGTCTTTATT  
GCTGATTTATTTTGTGTTTTTTATTTGCTATTTTATATTTGCTAATTTTCATTATTGCGAAATATATTACA  
TTGCTATTTTTTATTATATACGCTAGATTCAATTTTTATTTTTTCTATATTTTTCAATTTAATTTTTGATTTTGA  
AGGTAAATATATATAATTAATTATTAATAAATGGCCTTCAGTTGTGGAACCTCTCTCTACTCTGCTGTGCGC  
CAAGCTCCGTCCGTGTCATGCACCTCGTACATGGGAAGTTGATGAAGCCAGGCGGCGCCGAGTCATCAA  
ACGTTTGGCGCTGGAGCAAGAACGTATTTCGCAACGTTCTTGACGCCGGCGTCTATGACCAGGCGACATGGG  
AACAGGAGGACGCGCGCGATAATGAGTTCCTAACGGAACAATTAACAATTTATATACTATTTATTTCGATC  
GCCGAACGTTGCACGCGTCGACCTATTAAAGAGCACTCTCCTATATCAGTTTCGAATAGGTTTGTCTCCATT  
GGAATCCCTCAAAGTCGAGGTGCGTCAAGAAGCAGGCGAATGTATATTTAAGAAACCTAAATACACGCGCG  
TTTGCAAGAAAGTGAAGCGTGTGCAACCCGCTTCGTTCTGAAAAAGTTGTTCTGCTCCTATGTGTTCTAGA  
TCTCCTATGCTATTATTTAAGCTTAAGAAAATTATTTATGATTTGCACTTATATAGATTAAGAAAACAGAT  
TAGGATTTTGAAGCGTCAAAAACAGCGCGAGTATGAGTTAGAGTGTGTCACTAATCTGTTACAATTATCGA  
ATCCG**GTGCAGGC****CAAAACCAGAG****GGCGCGCCA****ATGGTGAGCAAGGGCGAGGAGCTGTTCAACCGGGGTGGTG**  
**CCCATCCTGGTTCGAGCTGGACGGCGACGTAAACGGCCACAAGTTCAAGCGTGTCCGGCGAGGGCGAGGGCGA**  
**TGCCACCTACGGCAAGCTGACCCTGAAGTTTCATCTGCACCACCGGCAAGCTGCCCGTGCCCTGGCCCCACCC**  
**TCGTGACCACCTGACCTACGGCGTGCAGTGCTTCAGCCGCTACCCCGACCACATGAAGCAGCAGCACTTC**  
**TTCAAGTCCGCCATGCCCCGAAGGCTACGTCCAGGAGCGCACCATCTTCTTCAAGGACGACGGCAACTACAA**  
**GACCCGCGCCGAGGTGAAGTTTCGAGGGCGACACCCTGGTGAACCGCATCGAGCTGAAGGGCATCGACTTCA**  
**AGGAGGACGGCAACATCCTGGGGCACAAGCTGGAGTACAACCTACAACAGCCACAACGTCTATATCATGGCC**  
**GACAAGCAGAAGAACGGCATCAAGGTGAAGTTCAAGATCCGCCACAACATCGAGGACGGCAGCGTGCAGCT**  
**CGCCGACCACTACCAGCAGAACACCCCCATCGGGCAGCGCCCCGTGCTGCTGCCCGACAACCACTACCTGA**  
**GCACCCAGTCCGCCCTGAGCAAAGACCCCCAACGAGAAGCGCGATCACATGGTCTGCTGGAGTTTCGTGACC**  
**GCCGCCGGGATCACTCTCGGCATGGACGAGCTGTACAAG****CGATCC****GTGCAGGC****CAAAACCAGAGATGGATAA**  
**CCCTAATCCAGGA**CCTGATGGCGAGGGTGAAGTTGAATTAGAAAAGGATAGTAATGTTGTTTTTAACAACCTC  
AGCGAGATCCTAGTACATCTATTCCAGCGCCGGTGAGCGTAAAATGGAGTAGATGGACTAGTAATGATGTA  
GTAGATGATTACGCCACAATCACATCTCGATGGTATCAGATTGCTGAATTTGTTTGGTCAAGGATGATCC  
ATTTGATAAGGAGTTAGCACGTTTAATTTTGCCTCGAGCTTTGTTATCTAGTATAGAGGCTAATTCTGATG  
CTATATGTGATGTGCCTAATACTATTCCATTTAAGGTACACGCATATTGGCGAGGCGATATGGAAGTTAGA  
GTTCAAATTAATTCAAATAAATTCCAAGTTGGTCAATTACAAGCTACTTGGTATTATTTCGGATCATGAGAA  
TTTGAATATATCGTCTAAGAGAAGCGTTTATGGATTTTACAAATGGATCATGCTTTGATTAGTGCGTCAG  
CAAGTAATGAAGCAAAATTAGTTATTCCATATAAGCATGTTTATCCATTTTTTACCAACAAGAATTGTGCCA  
GATTGGACTACTGGCATTTTAGATATGGGTGCTTTGAACATTTCGTGTAATTGCTCCCTTACGGATGAGTGC  
TACTGGTCCAACCTACCTGTAATGTCGTCGTGTTTATTAAATTAAATAACAGCGAGTTTACAGGGACTTCCT  
CTGGTAAGTTTTATGCGAGCCAAATCAGGGCAAAACCTGAGATGGATCGTATATTAAATTTAGCAGAAGGA  
TTGTTGAATAACACGATTGGTGGTAATAATATGGATAATCCTTCTTATCAACAATCTCCTCGTCATTTTGT  
CCCGACTGGTATGCACAGCTTAGCTTTAGGTACTAATTTAGTTGAACCATTACATGCATTACGTTTGGATG  
CAGCCGGTACGACACAACATCCTGTAGGTTGTGCTCCTGATGAAGATATGACTGTGTCTTCCATTGCATCT  
CGATATGGACTAATTAGACGGGTACAATGGAAGAAAGATCATGCTAAAGGATCGCTTTTGTTACAATTAGA  
TGCTGATCCATTTGTGGAGCAAAGAATTGAAGGTACGAATCCAATATCTTTGTATTGGTTTCGACCCCGTGG  
GTGTAGTATCTAGTATGTTTATGCAATGGCGTGGTTCATTAGAATATAGGTTTGTATATTATAGCATCCCAA  
TTTCATACTGGTAGGTTAATTGTAGGTTATGTGCCCGGTTTGACAGCATCTTTGCAACTTCAAATGGACTA  
TATGAAATTGAAGTCATCGAGTTATGTAGTATTTGATTTACAGGAAAGTAATAGCTTCACTTTTGGAGGTGC  
CATATGTTTTCATATAGACCATGGTGGGTGCGTAAATATGGTGGCAATTATTTGCCCTCGTCAACTGATGCT  
CCTAGTACATTATTCATGTATGTGCAGGTTCCGTTGATACCTATGGAAGCTGTTTCAGATACTATTGATAT  
CAATGTGTACGTACGGGGCGGTAGTTTCAATTTGAAGTTTGTGTTCCAGTCCAACCTAGTTTAGGTTTGAATT  
GGAACACAGACTTTATTTTACGTAATGACGAAGAATACAGGGCTAAGACAGGTTATGCACCATATTATGCT  
GGAGTGTGGCATAGCTTTAATAATAGTAATTTCTTGTTTTTTAGGTGGGGATCTGCTTCTGACCAAATTGC  
TCAGTGGCCGACAATTTTCACTACCAAGAGGTGAGTTAGCTTTCTTACGAATTAAGGATGGAAAGCAAGCTG  
CTGTAGGAACCTCAACCTTGGCGTACGATGGTGTGTTTGGCCTTCTGGTACGGCTATAATATTGGTATACCC  
ACGTATAATGCTGAACGAGCTCGCCAGCTTGCACAACACTTATATGGTGGTGGATCATTAACTGATGAGAA

GGCCAAACAATTATTTGTTCCCTGCTAATCAACAAGGACCTGGTAAGGTAAGTAATGGAAATCCGGTATGGG  
AAGTCATGCGTGCACCATTGTCAACACAGCGTGCGCATATGCAAGATTTTGAATTTATTGAGGCTATTCCA  
GAAGGAGAGGAGTCTCGTAATACTACAGTCTTGGATACGACCCTACTTTACAGTCGAGTGGGTTTGGTCG  
CGCCTTCTTTGGAGAAGCTTTTAATGATCTTAAACGTTAATGCGGCGATATCAATTATATGGTCAATTAT  
TATTGTCCGTTACTACGGATAAAGGATATTGATCATTGTATGTTTACCTTCCCTTGTTTACCACAAGGGTTA  
GCGTTAGACATTGGTTCTGCTGGCTCTCCACATGAAATCTTTAATAGATGTCGTGATGGTATTATACCATT  
AATTGCATCTGGATATAGATTTTATAGAGGAGATTTGCGTTATAAGATTGTTTTTCCAAGTAATGTTAATA  
GCAACATTTGGGTACAACATCGACCGGATCGTAGACTGGAAGGATGGTCCGCGGCTAAGATTGTAAATTGT  
GATGCTGTGTCTACTGGTCAAGGAGTGTATAATCATGGTTATGCTAGTCACATTCAAATCACGCGTGTA  
TAATGTTATAGAATTGGAAGTTCCATTTTATAATGCTACTTGTTATAATTATTTACAGGCGTTTAAATGCGT  
CTAGCGCTGCATCTAGTTATGCAGTATCTTTAGGAGAAATATCGGTTGGTTTTCAAGCCACAAGTGATGAT  
ATCGCATCTATCGTCAACAAACCTGTTACTATTTATTATAGTATTGGAGATGGTATGCAGTTTTCTCAGTG  
GGTTGGATATCAACCGATGATGATCCTAGATCAGCTTCCTGCACCAGTAGTAAGGGCCGTGCCTGAGGGCC  
CTATTGCGAAGATTAACAACTTCTTCCATCAAACAGCCGACGAAGTTAGAGAAGCTCAGGCAGCAAAGATG  
CGTGAAGATATGGGTATGGTTGTTCAAGATGTTATTGGAGAAGTTAGCCAGGCCATACCGGATCTTCAACA  
ACCGGAGGTTCAAGCAAATGTCTTCTCACTGGTGTCTCAGTTAGTGCATGCTATTATAGGTACTAGTTTGA  
AGACAGTAGCTTGGGCGATTGTTTCGATTTTTGTGACTTTAGGATTAATTGGACGCGAAATGATGCATTCA  
GTTATTACTGTAGTCAAGCGGTTACTTGAGAAATATCACTGGCGACGCAACCCAGGAATCCGCCAGTTC  
AAGTACTGTTATATCTGCCGTTCCAGAAGCTCCCAATGCTGAAGCGGAGGAGGCAAGTGCTTGGGTATCCA  
TTATTTATAATGGTGTGTGTAATATGCTTAATGTGGCTGCTCAAAAACCGAAACAATTTAAAGATTGGGTA  
AAATTAGCTACTGTAGATTTTGTAGTAATAATTGTAGAGGTAGTAATCAGGTATTTGTGTTTTTCAAGAACAC  
ATTTGAAGTGTTGAAGAAAATGTGGGGTTATGTATTTTGTGAGAGTAATCCTGCAGCGCGTTTTGTTGAAAG  
CTGTGAATGACGAGCCTGAGATTTTGAAAGCATGGGTGAAGGAATGTCTGTATTTGGATGATCCCAAATTT  
AGAATGCGTCGAGCGCATGATCAAGAGTATATCGAGCGAGTGTTTGCGGCACATTCATATGGACAAATTTT  
GCTACATGATTTAACTGCTGAAATGAACCAATCACGAAATTTGAGTGTGTTTACACGTGTGTATGATCAAA  
TTTCAAATTTGAAGACTGATCTTATGGAAATGGGATCGAATCCATATATAAGGCGTGAATGTTTTACGATA  
TGCATGTGTGGTGCATCTGGAATTTGGAAAATCATATTTGACCGATTCTTTATGCAGCGAGCTCTTACGTGC  
GAGTCGTACTCCTGTGACAACAGGCATAAAATGTGTTGTTAATCCATTATCTGATTATTGGGATCAGTGTG  
ATTTTCAGCCTGTTTTGTGCGTTGATGATATGTGGAGTGTTGAAACATCTACTACGCTCGATAAGCAGTTG  
AACATGCTTTTCCAGGTCCATTCCCCTATCGTGCTTTCTCCTCCTAAAGCTGATTTAGAAGGTAAGAAAAT  
GCGATATAACCCGGAATATTTATATACAATACGAATAAGCCTTTCCCGAGGTTTGATCGTATTGCTATGG  
AAGCTATTTATCGGCGTAGAAATGTTTTGATTGAATGTAAAGCGAGTGAAGAGAAGAAGCGAGGATGCAAA  
CATTGTGAGAACGATATTCCTATTGCTGAATGTAGTCCTAAGATGTTGAAAGATTTCCATCACATCATATT  
TAGGTATGCACATGATGTATGTAATTCTGAGACCACATGGTCTGAATGGATGACGTATAATGAATTTCTTG  
AATGGATAACTCCTGTGTATATGGCTAACCGTCGTAAGGCGAATGAATCGTTTTAAGATGCGTGTAGATGAA  
ATGCAAATGTTACGTATGGATGAGCCATTGGAAGGTGATAATATCCTCAATAAGTATGTTGAAGTTAATCA  
GCGCTTAGTGAGGAAATGAAGGCATTTAAGGAGCGTACACTATGGTCAGATTTACATCGTTTTAGGTGCGG  
AAGTTAGTGCGTCAGTTAAGAAAGCTTTACCAACTATTTCTATAACTGAAAACTACCACATTGGACTGTT  
CAATGTGGTATTGCTAAACCTGAGATGGATCATGCTTATGAGGTTATGAGTTCGTATGCAGCTGGAATGAA  
TGCAGAGATCGAAGCGCATGAACAAGTTCGGCGTTCATCAGTGGAATGTCAATATGCAGAGCCTCAAGCTC  
CAAGAAATCCTGATGATGAAGGACCAACCATAGATGAAGAACTTATGGGCGACACTGAATTCACATCACAG  
GCTCTAGAACGTCTTGTGGATGAAGGTTATATAACTGGAACAGAAAGTATATAGCTACGTGGTGTAG  
TAAGCGTCGTGAACATACTGCTGACTTTGATCTTGTGTGGACTGATAATTTGCGTGTGTTAAGCGCGTATG  
TGCATGAACGTTTCATCTTCAACTCGGCTTTCTACGGATGACGTCAAGTTATATAAAACGATTAGCATGTTA  
CATCAAAGTACGATAACCACAGAGTGTGCTAAATGTCAACATTGGTATGCACCGTTGACTGATATCTATGT  
TGATGACAAGAAATTTGTTCTGGTGTGAGAAAGAGAAAAAGACACTTATTGATGTCCGAAAATTTGTCGAAAG  
AAGATGTAAGTGTTCATCGAAATGATTAATTTATCTGTTCCCTTGTGGTGAAGTATGTATGTTACATTCA  
AAATATTTTAATTATCTTTTCCATAAAGCATGGTTGTTGAGAAATCCAAGTTGGCGCCTAATATATAATGG  
TACCAAGAAGGGTATGCCTGAGTACTTTATGAATTGTGTGGATGAAATATCGTTAGATTCCAAATTTGGTA  
AAGTGAAAGTATGGTTGCAAGCAATCATTGATAAGTATTTAACTCGTCCCGTGAAAATGATTTCGTGATTTT  
CTTTTCAAGTGGTGGCCGCAAGTTGCGTATGTGTTGAGCTTGCTAGGTATAATTGGTATAACTGCGTATGA  
AATGAGAAATCCGAAACCAACTTCTGAGGAATTAGCTGATCATTATGTGAATAGGCATTGTAGCTCTGATT  
TTTGGTCACCAGGACTGGCATCACCTCAAGGATTGAAATATAGTGAAGCAGTAACAGTAAAGGCACCTAGA  
ATCCATAGATTGCCAGTTACTACTAAGCCTCAGGGATCAACACAACAAGTAGACGCCGCTGTGAATAAAAT  
TCTACAGAACATGGTTTTATATTGGTGTGTTTTCCCAAAAGTGCCTGGTAGTAAGTGGCGAGATATTAATT  
TTAGGTGTCTTATGCTTCATAATAGGCAATGTTTAATGTTGAGGCATTATATTGAGTCAACTGCCGCCTTT  
CCTGAGGGAACCAAGTACTATTTTAAGTACATTCAATCAAGAGACTAGAATGTCTGGTGATATTTCTGG

TATTGAAATTGATTTGTTGAATTTACCTAGATTGTATTATGGTGGTCTCGCGGGAGAGGAGTCGTTTGATA  
GCAATATCGTGCTTGTGACTATGCCTAATCGTATTCCTGAGTGTAAGAGCATTATTAAATTTATAGCGTCA  
CATAATGAGCATATACGTGCTCAGAATGATGGAGTGTAGTAAGTGGCGACCATACTCAGCTATTGGCTTT  
CGAGAATAATAATAAACTCCAATAAGTATTAACGCTGATGGTTTGTATGAGGTTATACTTCAAGGAGTAT  
ATACTTATCCATACCACGGCGATGGTGTGTTGTTGTTGATATTGTTATCTCGGAATTTACAACGGCCAATT  
ATAGGTATCCATGTTGCTGGTACTGAGGGATTGCATGGTTTTGGAGTCGCTGAACCACTTGTACATGAAAT  
GTTACCGGTAAAGCGATCGAGAGTGAAAGAGAGCCGTATGATCGTGTGTATGAACTTCCGTTGCGTGAAT  
TAGATGAATCTGATATTGGTTTAGATACCGATTTATATCCGATTGGTAGAGTGGATGCAAAGCTAGCTCAT  
GCTCAAAGCCCTTCTACTGGGATTAAAAAGACGCTTATTCATGGAACATTTGATGTAAGGACTGAACCAAA  
TCCGATGTCATCACGTGATCCAAGAATAGCGCCGCATGATCCTTTGAAGTTAGGGTGTGAAAAGCATGGCA  
TGCCCTTGTTACCGTTTTAATAGGAAACATCTGGAATTAGCGACAAATCATTGAAAGAAAAAATTAGTTTCT  
GTAGTTAAACCAATAAATGGTTGCAAGATTAGAAGTTTGCAAGATGCTGTATGTGGTGTGCCTGGATTAGA  
TGGGTTTGATTCGATATCGTGGAATACTAGTGCTGGTTTTCTTTGTCTTCATTAAAGCCACCTGGAACAT  
CAGGTAAGCGATGGTTGTTTGATATTGAGCTACAAGACTCGGGATGTTATCTCCTGCGTGGAATGCGTCCC  
GAACTTGAGATTCAATTATCAACGACACAGTTAATGAGGAAAAAGGGAATAAAACCTCACACTATATTCAC  
GGATTGTTTGAAAGATACTTGTGCTGTTGAAAAATGTAGAATACCTGGTAAGACTAGAATATTTAGTA  
TAAGTCCGGTACAGTTTACCATACCGTTTTCGACAGTATTACCTAGACTTTATGGCATCCTATCGAGCTGCA  
CGACTTAATGCTGAGCATGGTATTGGTATTGATGTTAACAGCTTAGAGTGGACAAATTTGGCAACAAGGTT  
GTCTAAGTATGGCACTCACATCGTGACAGGAGACTATAAGAATTTTGGTCCTGGGTTAGATTCCGATGTTG  
CAGCTTCAGCGTTTGAAATTATTATCGACTGGGTATTACATTACACCGAAGAAGATAATAAAGACGAAATG  
AAGCGAGTAATGTGGACCATGGCGCAAGAGATCTTAGCGCCTAGTCATCTATATCGCGATTTAGTGTACCG  
AGTACCTTGCGGAATTCATCAGGTTCTCCAATAACGGACATATTGAATACAATTTCAAATTTGTTTGTAA  
TTAGGTTAGCTTGGTTAGGTATTACTGATTTGCCTTTGTCCGAGTTCTCTCAAATGTTGTTCTTGTCTGT  
TATGGCGACGATCTTATCATGAATGTTAGCGATAACATGATTGATAAGTTTAAACGCCGTGACGATAGGAAA  
ATTCTTTTACAATATAAGATGGAATTTACGGATCAGGATAAATCAGGAAATACTGTAAAGTGGCGGACGT  
TACAGACTGCTACTTTCTTAAAACATGGGTTTTTTAAAACATCCAAGTACCTGTGTTTCTAGCTAACCTG  
GATAAGGTCTCGGTAGAAGGAACGACGAATTGGACTCATGCTCGAGGATTGGGTCGTGCTACAGCAACCAT  
AGAAAATGCTAAACAAGCGTTAGAGTTAGCATTTGGGTGGGGTCCTGAATATTTTAAATTACGTCAGAAATA  
CCATTAATAATGGCTTTTGACAAGTTGGGTATTTATGAGGACCTTATCACATGGGATGAAATGGATGTTAGA  
TGTTACGCTAGTGCGTAATATTTAATTTTAAATACTTATTAATTTTAAATTTTATTTTATTTAGGTTATTGGAATT  
GAGGGAAGTACCACCCCCCAAGACCTTCGTTTTAAATCTACTAAGAGGAGTAAACCTATATATAAGAGTCT  
AAAGACAGAGTGGATTAGACCATCATCTTTAGCTTATATATGGGGAAGGTTGAGTTGCCTCTAAAGACTCA  
GCTCCGTAGTAGAGTAGTTTTAATTACGATTAAAGTGGTACTCTAGGTTAGGTGTTACTCGCGTATTATCA  
ACTTGTGGTAATGCGTCCTAATTTTAGTATAGTTTTTAACCATAATAGTAAAAAAAAAAAAAAAAAAAAAA  
AAAA
