# Supplementary material for: Development of a Honey Bee RNA Virus Vector Based on the Genome of Deformed Wing Virus
Source: Preprints.org preprint supplement (doi:10.20944/preprints202002.0321.v1), 2020-02-23
Supplement: Supplementary file 1 [file supplementary]

## Sheet: Sheet1
Table S2. Quantification of DWV and GFP RNA targets in individual pupae.
Numeric values for Figure 2. ND - not determined, pupa used to prepare filtered extracts marked with *.
Treatment, Group Number	Treatment, hours post injection (hpi).	Log 10 [DWV copies per bee]	Average Log 10 [DWV copies per bee]	SD Log 10 [DWV copies per bee]	Log 10 [GFP copies per bee]	Average Log 10 [GFP copies per bee]	SD Log 10 [GFP copies per bee]	Honey bee Actin mRNA RT-qPCR Ct values	Avereage Honey bee Actin mRNA RT-qPCR Ct values	SD Honey bee Actin mRNA RT-qPCR Ct values
1	PBS 72 hpi	6.4889	5.79083	0.801357	ND	ND	ND	26.4641	26.5943	0.220035
1	PBS 72 hpi	6.28707			ND			26.4357
1	PBS 72 hpi	4.47978			ND			26.2864
1	PBS 72 hpi	5.9721			ND			26.6439
1	PBS 72 hpi	4.93222			ND			26.8952
1	PBS 72 hpi	6.5849			ND			26.8404
2	DWV-304 Transcript - 72 hpi	11.0943	11.1414	0.337699	ND	ND	ND	26.1638	26.6093	0.538484
2	DWV-304 Transcript - 72 hpi	11.3169			ND			26.3674
2	DWV-304 Transcript - 72 hpi	10.5103			ND			26.954
2	DWV-304 Transcript - 72 hpi	11.3142			ND			27.4931
2	DWV-304 Transcript - 72 hpi	11.4716			ND			26.068
3	DWV-L-GFP -Transcript 72 hpi*	10.627	10.5402	0.0895945	10.7183	10.5132	0.149446	26.7392	26.4996	0.249925
3	DWV-L-GFP -Transcript 72 hpi	10.4169			10.3664			26.1548
3	DWV-L-GFP -Transcript 72 hpi	10.5766			10.455			26.6048
4	DWV-L-GFP -Extract 72 hpi	10.4547	10.4603	0.139183	9.44786	9.87038	0.364219	26.368	26.3124	0.257281
4	DWV-L-GFP -Extract 72 hpi	10.6832			10.2906			25.9282
4	DWV-L-GFP -Extract 72 hpi	10.5159			10.1447			26.4994
4	DWV-L-GFP -Extract 72 hpi	10.4953			9.95797			26.0353
4	DWV-L-GFP -Extract 72 hpi	10.2203			10.0734			26.6752
4	DWV-L-GFP -Extract 72 hpi	10.3924			9.30767			26.3681
5	DWV-S-GFP -Transcript 72 hpi	10.8148	10.6698	0.114629	10.5994	10.5453	0.129292	26.7974	26.2756	0.303094
5	DWV-S-GFP -Transcript 72 hpi	10.495			10.326			26.1356
5	DWV-S-GFP -Transcript 72 hpi	10.6682			10.5943			26.1211
5	DWV-S-GFP -Transcript 72 hpi*	10.701			10.6613			26.0482
6	DWV-S-GFP -Extract 6 hpi	6.35176	6.41111	0.0756576	6.5459	6.40778	0.120865	26.0328	26.0789	0.200977
6	DWV-S-GFP -Extract 6 hpi	6.30744			6.45004			25.831
6	DWV-S-GFP -Extract 6 hpi	6.51288			6.51229			26.2433
6	DWV-S-GFP -Extract 6 hpi	6.47427			6.28363			26.3706
6	DWV-S-GFP -Extract 6 hpi	6.40921			6.24703			25.9168
7	DWV-S-GFP -Extract 24 hpi	9.45704	9.48198	0.157024	8.80692	9.1899	0.261193	26.5161	26.4162	0.403082
7	DWV-S-GFP -Extract 24 hpi	9.67211			8.8075			26.415
7	DWV-S-GFP -Extract 24 hpi	9.26526			9.23274			25.8687
7	DWV-S-GFP -Extract 24 hpi	9.53603			9.46356			26.0121
7	DWV-S-GFP -Extract 24 hpi	9.48294			9.25412			26.4891
7	DWV-S-GFP -Extract 24 hpi	9.27297			9.26011			27.2273
7	DWV-S-GFP -Extract 24 hpi	9.68753			9.50434			26.385
8	DWV-S-GFP -Extract 48 hpi	10.293	10.3219	0.175291	9.20007	9.73698	0.236106	26.4767	26.4425	0.219614
8	DWV-S-GFP -Extract 48 hpi	10.3311			9.84318			26.3183
8	DWV-S-GFP -Extract 48 hpi	10.5154			9.86304			25.9813
8	DWV-S-GFP -Extract 48 hpi	10.3236			9.88868			26.4844
8	DWV-S-GFP -Extract 48 hpi	10.4862			9.91411			26.4967
8	DWV-S-GFP -Extract 48 hpi	9.93754			9.62464			26.6632
8	DWV-S-GFP -Extract 48 hpi	10.3666			9.82517			26.6768
9	DWV-S-GFP -Extract 72 hpi	10.0001	10.5222	0.287575	9.42074	9.80582	0.199649	26.8691	26.4025	0.337195
9	DWV-S-GFP -Extract 72 hpi	10.6573			9.90548			26.6862
9	DWV-S-GFP -Extract 72 hpi	10.5409			9.76245			26.0791
9	DWV-S-GFP -Extract 72 hpi	10.613			10.1235			26.0753
9	DWV-S-GFP -Extract 72 hpi	11.0245			9.91666			25.9354
9	DWV-S-GFP -Extract 72 hpi	10.3787			9.73638			26.5706
9	DWV-S-GFP -Extract 72 hpi	10.4412			9.77558			26.6016
