# Supplementary material for: Development of a Honey Bee RNA Virus Vector Based on the Genome of Deformed Wing Virus
Source: Preprints.org preprint supplement (doi:10.20944/preprints202002.0321.v1), 2020-02-23
Supplement: Supplementary file 2 [file Table-S1__Primers.xlsx]

## Sheet: Sheet1
Table S1. Primers and the synthetic gene used in this study.
Positions in the DWV genomic RNA are acording to GenBank Accession number MG831200)
Primer ID	Nucleotide sequence (5'-3')	Application, notes
1-Flank-For	GCGATAATGAGTTCCTAAC	Positions 1365 to 1383 of DWV-304. Forward. Overlap extension PCR. Cloning of pDWV-L-GFP, pDWV-S-GFP.
2-Flank-Rev	CACTCCTTGACCAGTAGACACAG	Complementary to positions 5067 to 5089 of DWV-304. Reverse, overlap extension PCR. Cloning of pDWV-L-GFP, pDWV-S-GFP.
14-AscBiamhi-VQAKPEM-For	GGCGCGCCaggaTCTGGATCCGTGCAGGCAAAACCAGAGATG	Overlap extension PCR, Forward mutagenic primer, DWV-LP-VP2 border. Positions 1784 to 1801 of DWV genomic RNA. Cloning of pDWV-L-GFP, pDWV-S-GFP.
15-MDNPNPG-BamhiAsci-Rev	GGATCCAGAtcctGGCGCGCCTCCTGGATTAGGGTTATCCATC	Overlap extension PCR, Reverse mutagenic primer, DWV-LP-VP2 border. Cloning of pDWV-L-GFP. Complementary to postions 1798 to 1818 of DWV genomic RNA.
16-VQAKPE-BamhiAsci-Rev	GGATCCAGAtcctGGCGCGCCCTCTGGTTTTGCCTGCACcggattc	Overlap extension PCR, Reverse mutagenic primer, DWV-LP-VP2 border. Cloning of pDWV-S-GFP. Complementary toi postions 1774 to 1798 of DWV genomuic RNA.
17-Asci-GFP-for	gcgatGGCGCGCCaATGGTGAGCAAGGGCGAGGAG	Amplification of eGFP, cloning of DWV-L-GFP and DWV-S-GFP, positions 1 to 21 of eGFP sequence
18-BamH-GFP-Rev	gcgatggatccCTTGTACAGCTCGTCCATGCCGAGAG	Amplification of eGFP, cloning of DWV-L-GFP and DWV-S-GFP, complementary to postions 692 to 717 of eGFP sequence.
GFP-13-qPCR-F	GCGACGTAAACGGCCACAAGT	GFP-specific qRT-PCR. Postions 62 to 82 of eGFP sequence.
GFP-15-qPCR-R	CGCTGCCGTCCTCGATGTTGT	GFP-specific qRT-PCR. Complementary to postions 509 to 529 of eGFP sequence
Amel-qbACT-F	AGGAATGGAAGCTTGCGGTA	qRT-PCR. Apis mellifera actin mRNA, GenBank Accession NM_001185145), positions 937-956.
Amel-qbACT-R	AATTTTCATGGTGGATGGTGC	qRT-PCR. Apis mellifera actin mRNA, GenBank Accession NM_001185145, complementary to positions 1117-1097.
DWV-For	GAGATCGAAGCGCATGAACA	qRT-PCR. DWV genomic RNA, positions 6497-6516 of DWV-304 (7268 to 7287 of DWV-GFP)
DWV-Rev	TGAATTCAGTGTCGCCCATA	qRT-PCR. DWV genomic RNA, complementary to positions 6626-6607 of DWV-304 (and complementary to positions 7378 to 7397 of DWV-GFP)
02-DWV20F	GCCTTCCATAGCGAATTACG	RT-PCR amplification of the DWV IRES sequence, positions 30-49 of DWV genomic RNA
05-DWV1240Rev	CGCCGCCTAGCTTCATCA	RT-PCR amplification of the DWV IRES sequence, complementary to positions 1236-1252 of DWV genomic RNA
03-DWV900F	GTTAATGTCTCATAGCCCAGACG	RT-PCR amplification of DWV LP-eGFP-Vp2 fragment, positions 925 to 947 of DWV genomic RNA
DWV-lp-1580for	CAAGAAAGTGAAGCGTGTTG	RT-PCR amplification of DWV LP-eGFP-Vp2 fragment, positions 1567 to 1586 of DWV genomic RNA
09-DWV2050Rev	CATATAGCATCAGAATTAGCCTC	RT-PCR amplification of DWV LP-eGFP-Vp2 fragment, complementary to positions 2075 to 2097 of DWV genomic RNA

## Sheet: Sheet2
Supplementary Table S4. Primers and synthetic genes used in this study.
