# Supplementary material for: Development of a Honey Bee RNA Virus Vector Based on the Genome of Deformed Wing Virus
Source: Preprints.org preprint supplement (doi:10.20944/preprints202002.0321.v1), 2020-02-23
Supplement: Supplementary file 4 [file Table-S3__ANOVA-for-Fig-2-DWV-GFP.xlsx]

## Sheet: Sheet1
Table S3. Statistical significance of the differences between DWV and GFP RNA copy numbers. P-values, ANOVA analysis. Non-significant (P>0.05%, ANOVA) are highlighted.
		Treatment group	2	3	4	5	6	7	8	9	3	4	5	6	7	8	9
		RT-qPCR tagret	DWV	DWV	DWV	DWV	DWV	DWV	DWV	DWV	GFP	GFP	GFP	GFP	GFP	GFP	GFP
Treatment group	RT-qPCR tagret		DWV-304 Transcript - 72 hpi	DWV-L-GFP -Transcript 72 hpi	DWV-L-GFP -Extract 72 hpi	DWV-S-GFP -Transcript 72 hpi	DWV-S-GFP -Extract 6 hpi	DWV-S-GFP -Extract 24 hpi	DWV-S-GFP -Extract 48 hpi	DWV-S-GFP -Extract 72 hpi	DWV-L-GFP -Transcript 72 hpi	DWV-L-GFP -Extract 72 hpi	DWV-S-GFP -Transcript 72 hpi	DWV-S-GFP -Extract 6 hpi	DWV-S-GFP -Extract 24 hpi	DWV-S-GFP -Extract 48 hpi	DWV-S-GFP -Extract 72 hpi
1	DWV	DWV-304 Extract - 72 hpi	<.0001	<.0001	<.0001	<.0001	0.153462	<.0001	<.0001	<.0001	<.0001	<.0001	<.0001	0.157291	<.0001	<.0001	<.0001
2	DWV	DWV-304 Transcript - 72 hpi		0.039834	0.002787	0.050492	<.0001	<.0001	0.000541	0.010887	0.038537	0.00044	0.021471	<.0001	<.0001	<.0001	<.0001
3	DWV	DWV-L-GFP -Transcript 72 hpi			0.450003	0.229739	<.0001	<.0001	0.104589	0.922805	0.834019	0.027787	1	<.0001	<.0001	0.000912	0.000592
4	DWV	DWV-L-GFP -Extract 72 hpi				0.05596	<.0001	<.0001	0.180002	0.663399	0.660655	0.006975	0.411694	<.0001	<.0001	<.0001	<.0001
5	DWV	DWV-S-GFP -Transcript 72 hpi					<.0001	<.0001	0.010538	0.397234	0.241984	0.005217	0.258185	<.0001	<.0001	<.0001	<.0001
6	DWV	DWV-S-GFP -Extract 6 hpi						<.0001	<.0001	<.0001	<.0001	<.0001	<.0001	1	<.0001	<.0001	<.0001
7	DWV	DWV-S-GFP -Extract 24 hpi							<.0001	<.0001	<.0001	0.038235	<.0001	<.0001	0.036891	0.047941	0.008788
8	DWV	DWV-S-GFP -Extract 48 hpi								0.171047	0.178948	0.021569	0.075029	<.0001	<.0001	0.000383	0.000463
9	DWV	DWV-S-GFP -Extract 72 hpi									1	0.006909	0.890652	<.0001	<.0001	0.000233	0.000302
3	GFP	DWV-L-GFP -Transcript 72 hpi										0.036027	0.801897	<.0001	<.0001	0.001533	0.001147
4	GFP	DWV-L-GFP -Extract 72 hpi											0.012943	<.0001	0.0042	0.481817	0.715393
5	GFP	DWV-S-GFP -Transcript 72 hpi												<.0001	<.0001	0.000287	0.000197
6	GFP	DWV-S-GFP -Extract 6 hpi													<.0001	<.0001	<.0001
7	GFP	DWV-S-GFP -Extract 24 hpi														0.0025	0.000621
8	GFP	DWV-S-GFP -Extract 48 hpi															0.593924
