# Supplementary material for: Development of a Honey Bee RNA Virus Vector Based on the Genome of Deformed Wing Virus
Source: Preprints.org preprint supplement (doi:10.20944/preprints202002.0321.v1), 2020-02-23
Supplement: Supplementary file 5 [file supplementary]

A

Difference between DWV and GFP RNA copy numbers in individual bee

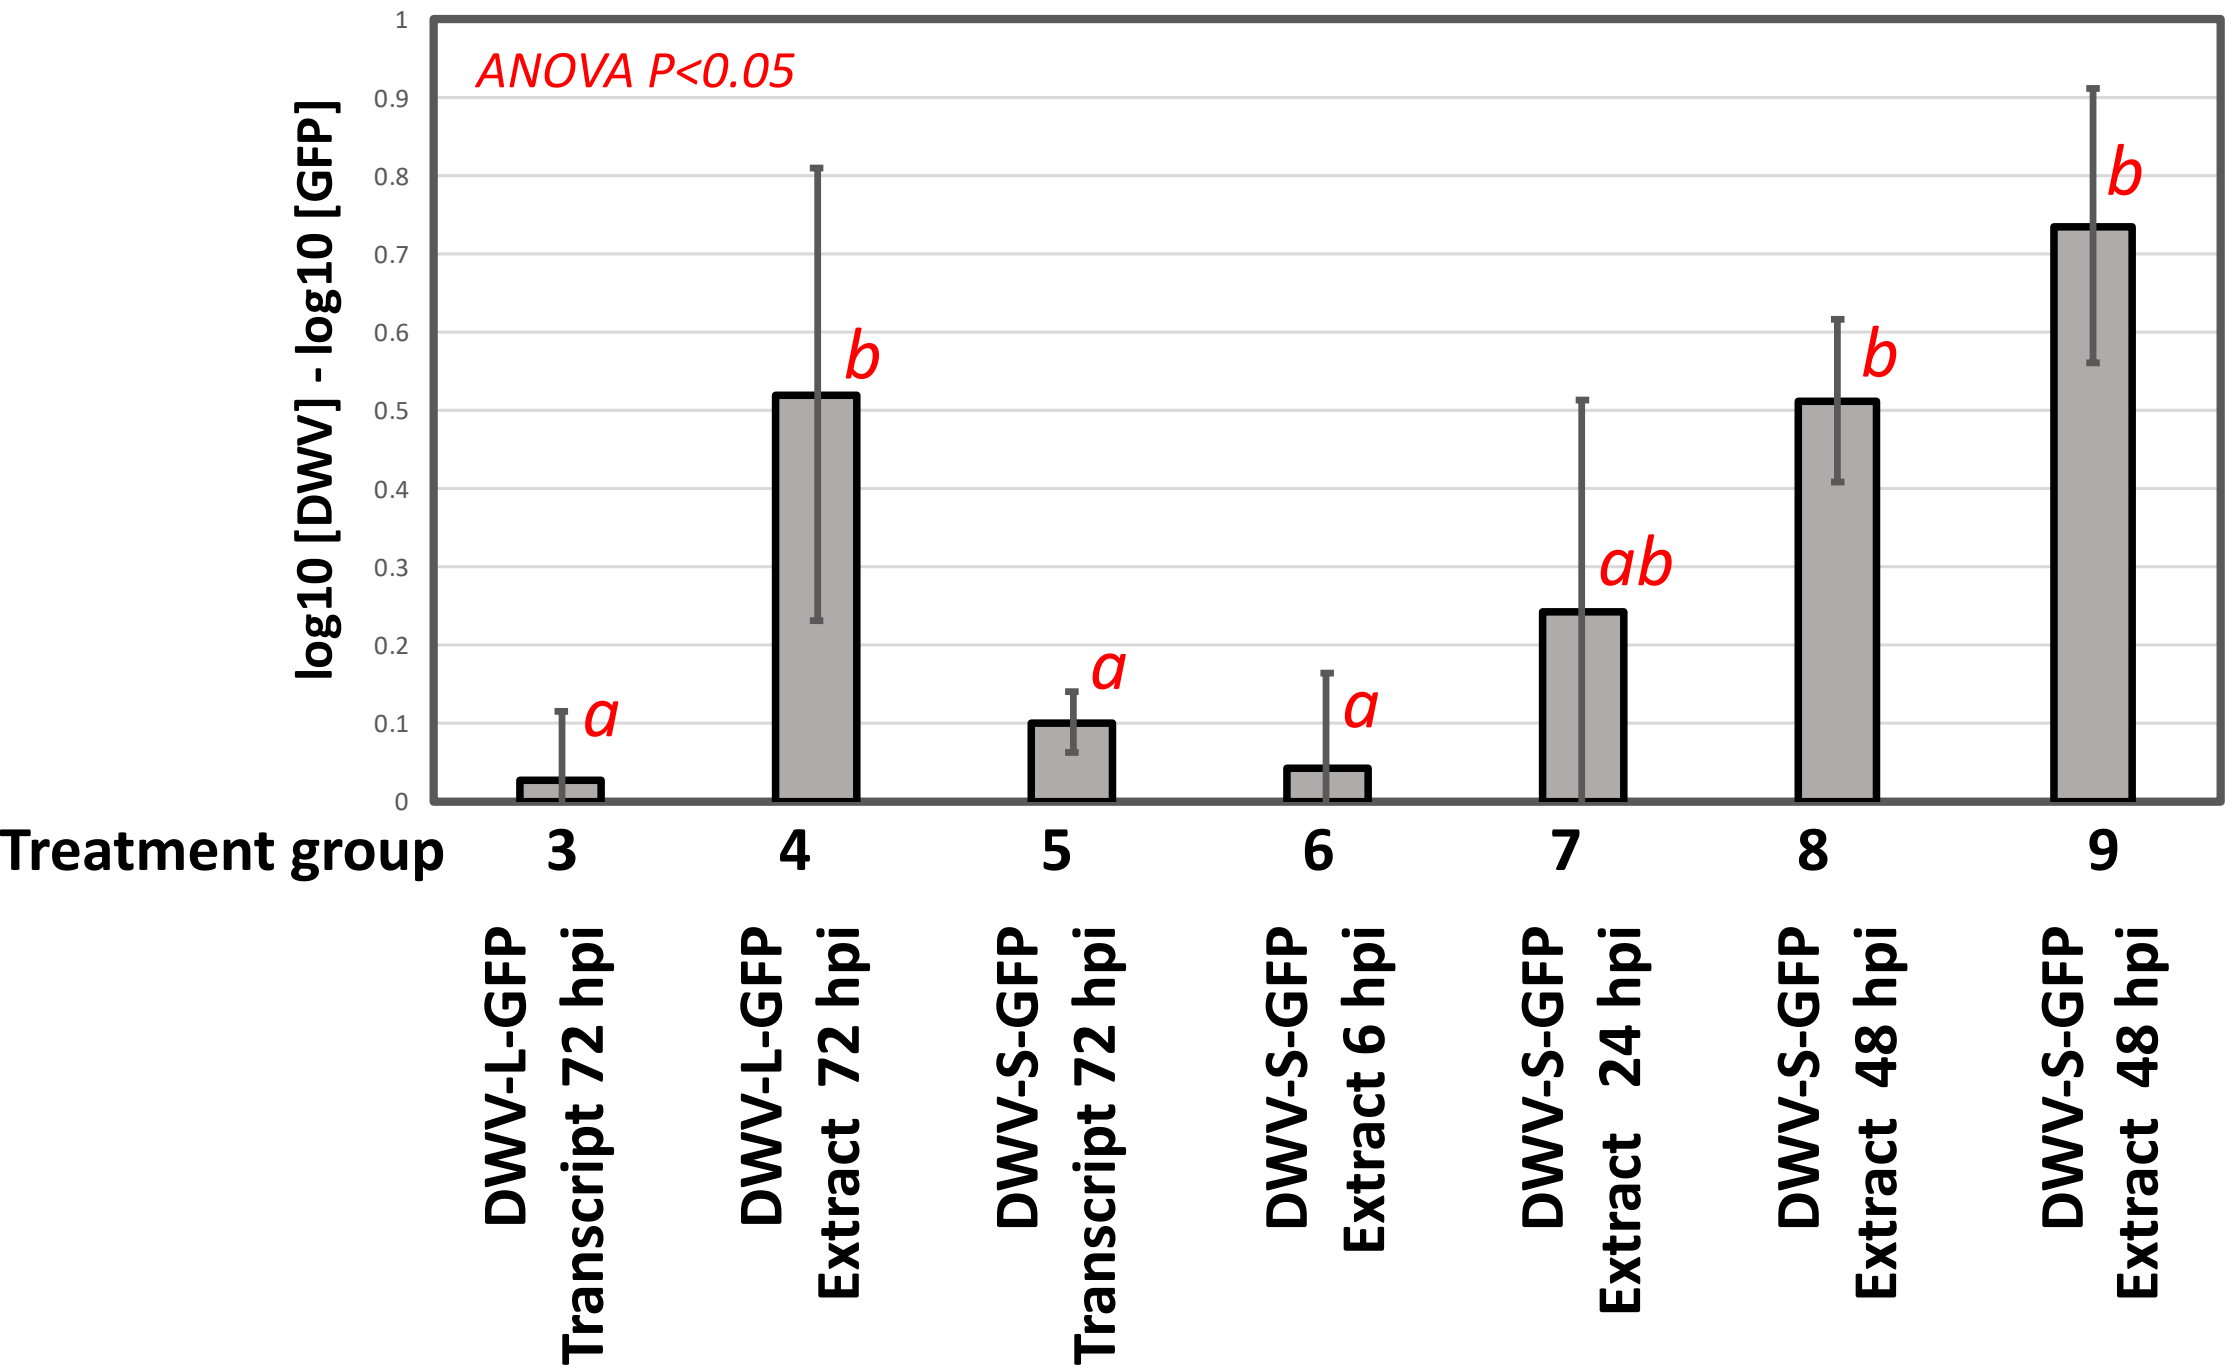

B

|                    | Ttreatment group*            | 4                          | 5                             | 6                         | 7                          | 8                          | 9                          |
|--------------------|------------------------------|----------------------------|-------------------------------|---------------------------|----------------------------|----------------------------|----------------------------|
| Ttreatment group * |                              | DWV-L-GFP - Extract 72 hpi | DWV-S-GFP - Transcript 72 hpi | DWV-S-GFP - Extract 6 hpi | DWV-S-GFP - Extract 24 hpi | DWV-S-GFP - Extract 48 hpi | DWV-S-GFP - Extract 72 hpi |
| 3                  | DWV-L-GFP -Transcript 72 hpi | 0.03824                    | 0.282417                      | 0.868186                  | 0.267553                   | 0.000228                   | 0.000342                   |
| 4                  | DWV-L-GFP -Extract 72 hpi    |                            | 0.033378                      | 0.012333                  | 0.127334                   | 1.0000                     | 0.157573                   |
| 5                  | DWV-S-GFP -Transcript 72 hpi |                            |                               | 0.446633                  | 0.383298                   | <.0001                     | 0.000125                   |
| 6                  | DWV-S-GFP -Extract 6 hpi     |                            |                               |                           | 0.194915                   | <.0001                     | <.0001                     |
| 7                  | DWV-S-GFP -Extract 24 hpi    |                            |                               |                           |                            | 0.041487                   | 0.0028                     |
| 8                  | DWV-S-GFP -Extract 48 hpi    |                            |                               |                           |                            |                            | 0.019779                   |

\* Treatment group number as in Fig. 2

**Figure S2. Accumulation of the *egfp* deletant genomes in individual honey bee pupae.** (A) Average copy numbers for the differences between DWV and GFP loads ( $\text{Log}_{10}(\text{DWV})$  minus  $\text{Log}_{10}(\text{GFP})$ ) calculated for individual pupa in the treatment groups are shown as grey graphs, the error bars show  $\pm$  standard deviation (SD). Treatments are shown below the graphs. Inocula: PBS - phosphate buffered saline; “Transcript”, *in vitro* RNA transcript; Extract, filtered extract from the pupae infected with the corresponding RNA transcript. Red letters above the bars indicate significantly groups (ANOVA,  $P < 0.05$ ). (B). Statistical significance of the  $\text{Log}_{10}(\text{DWV})$  minus  $\text{Log}_{10}(\text{GFP})$  differences between the treatment groups. P-values, ANOVA analysis. Non-significant co ( $P > 0.05\%$ , ANOVA) are highlighted
