# Supplementary material for: Development of a Honey Bee RNA Virus Vector Based on the Genome of Deformed Wing Virus
Source: Preprints.org preprint supplement (doi:10.20944/preprints202002.0321.v1), 2020-02-23
Supplement: Supplementary file 9 [file supplementary]

Archive with 15 entries (14 files):
- Table-S1__Primers.xlsx
- __MACOSX/
- __MACOSX/._Table-S1__Primers.xlsx
- Table-S3__ANOVA-for-Fig-2-DWV-GFP.xlsx
- __MACOSX/._Table-S3__ANOVA-for-Fig-2-DWV-GFP.xlsx
- Text-S1_Design of GFP-tagged-DWV.pdf
- __MACOSX/._Text-S1_Design of GFP-tagged-DWV.pdf
- Figure-S2__DWV-minus-GFP.pdf
- __MACOSX/._Figure-S2__DWV-minus-GFP.pdf
- Table-S2__DWV-GFP-COPIES-ACTIN-Ct.xlsx
- __MACOSX/._Table-S2__DWV-GFP-COPIES-ACTIN-Ct.xlsx
- Text-S2__DWV-L-GFP-DWV-S-GFP-Sequences.pdf
- __MACOSX/._Text-S2__DWV-L-GFP-DWV-S-GFP-Sequences.pdf
- Figure-S1__DWV-GFP.pdf
- __MACOSX/._Figure-S1__DWV-GFP.pdf
